# Supplementary material for: Exfoliation of one-dimensional TiO5 chain in K2TiO3
Source: Royal Society of Chemistry journal article supplement (doi:10.1039/c4dt01891e), 2014-01-01
Supplement: c4dt01891e1.pdf [file c4dt01891e1.pdf]

## Supporting Information

### Exfoliation of one-dimensional $\text{TiO}_5$ chain in $\text{K}_2\text{TiO}_3$

Yuji Masubuchi\*, Ryo Miyazaki, Hiroki Kikuchi, Teruki Motohashi, Shinichi Kikkawa

Faculty of Engineering, Hokkaido University, N13 W8, Kita-ku, Sapporo, Hokkaido 060-8628, Japan

1. XRD patterns for potassium titanates obtained from mixtures of  $\text{KNO}_3/\text{TiO}_2$  in molar ratios of 2.0–2.3/1. Single phase  $\text{K}_2\text{TiO}_3$  was obtained at a molar ratio of 2.2/1.

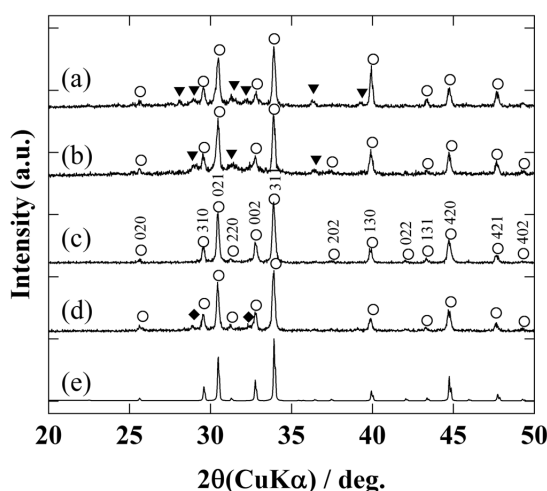

Fig. S1. XRD patterns for potassium titanate obtained from mixtures of  $\text{KNO}_3/\text{TiO}_2$  in molar ratios of (a) 2/1, (b) 2.1/1, (c) 2.2/1, and (d) 2.3/1. Pattern (e) is a diffraction pattern calculated using crystallographic data for  $\text{K}_2\text{TiO}_3$  [H. S. Khalsa, et al., *Mater. Res. Bull.*, 2009, **44**, 91-94]. Diffraction lines marked with open circles, filled triangles and diamonds were assigned to those of  $\text{K}_2\text{TiO}_3$ ,  $\text{K}_6\text{Ti}_4\text{O}_{11}$ , and  $\text{K}_6\text{Ti}_2\text{O}_7$ , respectively.

2. SEM image of  $\text{K}_2\text{TiO}_3$  obtained at K:Ti = 2.2:1 indicates agglomerates of small particles ( $<1\ \mu\text{m}$ ).

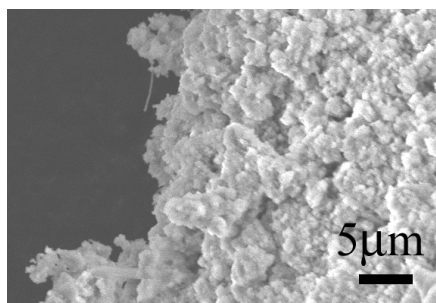

Fig. S2. SEM image of  $\text{K}_2\text{TiO}_3$  powder.

3. After 3 days, the average particle size decreased from ca. 800 nm to 300 nm, and the zeta potential increased from 0 V to 30 mV for the  $\text{K}_2\text{TiO}_3/\text{HNO}_3(\text{aq})$  colloidal solution.

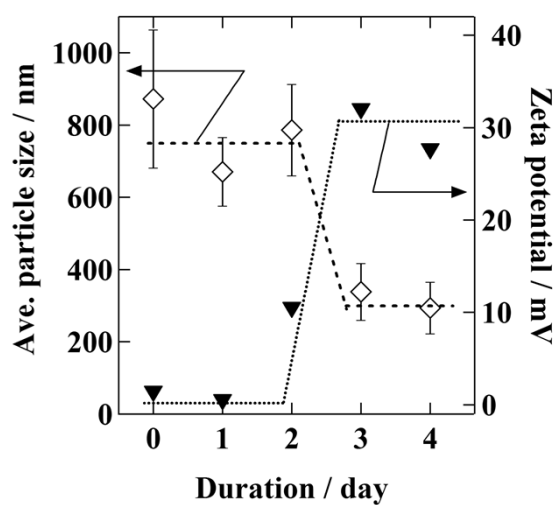

Fig. S3. Average particle size and zeta potential for the  $\text{K}_2\text{TiO}_3/\text{HNO}_3(\text{aq})$  colloidal solution over time.

4. Potassium ion concentrations were analyzed by ICP-AES. 43.5 mg of as-prepared  $\text{K}_2\text{TiO}_3$  powders ( $2.5 \times 10^{-4}$  mol) were dispersed in 100 mL of 1M- $\text{HNO}_3$  solution. The solution was separated from the colloidal particle through a cellulose nitrate filter (0.1  $\mu\text{m}$  pore size) after each duration time. The saturated  $\text{K}^+$  concentration was slightly higher than the starting material, maybe due to the K-rich composition of the starting mixtures and experimental error (weigh-in in a glove box). The line was drawn to represent the concentration change, excepting the value at 0 day because of insufficient equilibrium reaction in very short duration time.

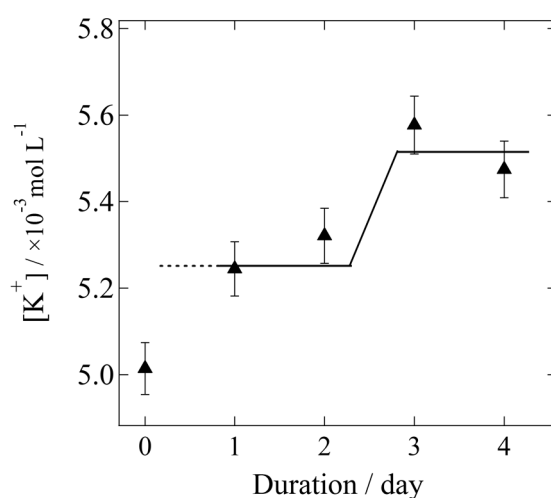

Fig. S4. Potassium concentration of the colloidal solution dependent on duration time.

5. X-ray absorption spectra were measured for  $\text{K}_2\text{TiO}_3$  and  $\text{K}_2\text{TiO}_3$  in nitric acid solution to elucidate the local structure around  $\text{Ti}^{4+}$  in the colloidal solution. The strong pre-edge peak at 4969 eV for the colloidal solution implies that  $\text{Ti}^{4+}$  in the solution have distorted octahedral coordination with additional hydronium ions.

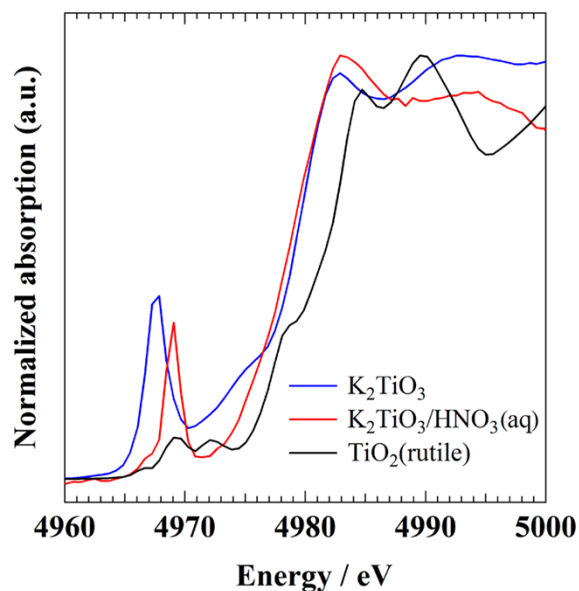

Fig. S5. Ti K-edge XANES spectra of  $\text{K}_2\text{TiO}_3$  and  $\text{K}_2\text{TiO}_3$  in nitric acid solution. The spectrum of  $\text{TiO}_2$  (rutile) is also shown for reference.
